# Supplementary material for: Deciphering Winter Sprouting Potential of Erianthus procerus Derived Sugarcane Hybrids under Subtropical Climates
Source: MDPI journal article supplement (doi:10.3390/plants13071023), 2024-04-03
Supplement: s1 [file s1]

**Table S1.** Mean performance of *E. procerus* derived hybrids and standard varieties during the year 2018-19

| Clones        | Tiller<br>60 DAP<br>(000-<br>ha) | Tiller<br>90D AP<br>(000-<br>ha) | Tiller<br>120 DAP<br>(000-ha) | PH<br>(cm) | CD<br>(cm) | JW<br>(kg) | JE (%) | Brix<br>(%) | Pol %<br>(%) | Pur<br>(%) | SCW<br>(kg) | Fibre<br>(%) | NMC<br>(000-<br>ha) | CY<br>(t/ha) | NBI   | Chl<br>(µg/cm <sup>2</sup> ) | Flav | Anth | LA<br>(cm <sup>2</sup> ) |
|---------------|----------------------------------|----------------------------------|-------------------------------|------------|------------|------------|--------|-------------|--------------|------------|-------------|--------------|---------------------|--------------|-------|------------------------------|------|------|--------------------------|
| Co 0238       | 146.67                           | 150.26                           | 165.19                        | 233.33     | 2.47       | 2.58       | 47.34  | 20.51       | 18.21        | 88.84      | 1.08        | 14.19        | 87.41               | 92.69        | 23.83 | 28.41                        | 1.20 | 0.18 | 203.12                   |
| Co 06027      | 88.89                            | 84.44                            | 83.70                         | 186.67     | 2.97       | 3.16       | 53.70  | 20.56       | 17.95        | 87.28      | 0.92        | 14.70        | 75.37               | 69.55        | 33.03 | 38.70                        | 1.18 | 0.13 | 277.25                   |
| CoJ 64        | 112.59                           | 126.67                           | 129.63                        | 140.00     | 1.87       | 1.06       | 40.16  | 20.32       | 17.98        | 88.49      | 0.47        | 14.82        | 97.04               | 44.06        | 21.27 | 29.11                        | 1.38 | 0.12 | 273.02                   |
| CoS 767       | 108.89                           | 125.93                           | 132.59                        | 136.67     | 1.83       | 0.97       | 39.58  | 19.71       | 16.57        | 84.01      | 0.58        | 14.57        | 81.85               | 47.09        | 30.01 | 37.02                        | 1.24 | 0.15 | 256.21                   |
| CoS 8436      | 110.37                           | 104.44                           | 140.00                        | 190.00     | 2.23       | 1.50       | 37.27  | 19.36       | 16.81        | 86.62      | 0.65        | 13.54        | 96.30               | 63.61        | 28.69 | 34.61                        | 1.22 | 0.15 | 237.64                   |
| GU 04(28)EO-2 | 127.37                           | 103.70                           | 171.85                        | 243.33     | 1.50       | 0.27       | 12.29  | 13.68       | 9.14         | 66.65      | 0.35        | 21.34        | 102.22              | 35.15        | 38.04 | 46.84                        | 1.16 | 0.12 | 191.72                   |
| GU 12-16      | 137.04                           | 129.63                           | 148.89                        | 220.00     | 1.80       | 0.98       | 28.87  | 17.16       | 14.75        | 85.67      | 0.65        | 20.59        | 102.96              | 65.23        | 33.37 | 38.63                        | 1.15 | 0.15 | 269.72                   |
| GU 12-19      | 191.11                           | 219.26                           | 261.48                        | 226.67     | 1.87       | 1.18       | 31.13  | 17.27       | 14.74        | 85.19      | 0.58        | 22.46        | 130.37              | 72.90        | 41.23 | 38.90                        | 0.95 | 0.13 | 213.01                   |
| GU 12-21      | 93.33                            | 99.56                            | 120.00                        | 193.33     | 2.00       | 0.84       | 30.89  | 15.20       | 12.23        | 80.20      | 0.58        | 21.13        | 134.81              | 77.40        | 35.54 | 37.73                        | 1.05 | 0.14 | 223.67                   |
| GU 12-22      | 67.04                            | 81.00                            | 97.78                         | 146.67     | 2.43       | 0.94       | 36.59  | 16.08       | 13.26        | 82.42      | 0.68        | 19.84        | 92.59               | 62.70        | 26.63 | 29.43                        | 1.11 | 0.18 | 254.41                   |
| GU 12-23      | 102.78                           | 100.37                           | 114.44                        | 213.33     | 2.00       | 1.27       | 36.33  | 16.61       | 14.34        | 85.34      | 0.87        | 19.45        | 83.70               | 72.38        | 31.89 | 38.78                        | 1.26 | 0.15 | 236.33                   |
| GU 12-26      | 131.85                           | 157.78                           | 197.04                        | 253.33     | 1.97       | 1.50       | 37.08  | 18.66       | 16.28        | 87.24      | 0.75        | 17.96        | 92.22               | 68.37        | 33.64 | 39.53                        | 1.17 | 0.16 | 185.56                   |
| GU 12-27      | 169.63                           | 174.81                           | 155.56                        | 263.33     | 2.07       | 1.59       | 35.43  | 16.36       | 13.97        | 85.33      | 0.62        | 17.93        | 120.74              | 74.92        | 34.99 | 34.50                        | 1.01 | 0.15 | 220.28                   |
| GU 12-28      | 169.63                           | 167.41                           | 198.00                        | 243.33     | 1.83       | 0.99       | 30.71  | 16.64       | 12.51        | 75.49      | 0.81        | 24.20        | 101.48              | 81.40        | 37.51 | 39.89                        | 1.07 | 0.14 | 244.35                   |
| GU 12-29      | 102.96                           | 132.59                           | 220.00                        | 156.67     | 1.67       | 0.77       | 31.26  | 16.04       | 11.78        | 72.93      | 0.46        | 22.34        | 130.44              | 57.46        | 30.26 | 35.88                        | 1.19 | 0.16 | 254.40                   |
| GU 12-30      | 210.00                           | 220.59                           | 182.96                        | 243.33     | 1.73       | 1.03       | 31.68  | 16.51       | 13.90        | 84.27      | 0.89        | 24.92        | 110.67              | 91.88        | 20.72 | 25.73                        | 1.27 | 0.16 | 233.55                   |
| GU 12-31      | 158.52                           | 146.67                           | 147.33                        | 233.33     | 2.07       | 1.24       | 34.71  | 15.85       | 13.34        | 84.10      | 0.66        | 22.47        | 119.85              | 78.58        | 36.48 | 41.84                        | 1.16 | 0.14 | 303.59                   |
| GU 12-33      | 131.11                           | 149.63                           | 115.56                        | 193.33     | 1.70       | 0.73       | 29.30  | 15.96       | 13.15        | 81.98      | 0.54        | 22.94        | 113.33              | 61.76        | 41.93 | 36.70                        | 0.89 | 0.13 | 247.83                   |
| GU 12-34      | 105.93                           | 115.56                           | 159.78                        | 173.33     | 2.13       | 1.16       | 36.77  | 18.42       | 15.69        | 85.45      | 0.62        | 19.92        | 111.11              | 68.17        | 35.12 | 36.26                        | 1.04 | 0.14 | 271.68                   |
| GU 12-38      | 173.33                           | 169.63                           | 160.74                        | 223.33     | 2.00       | 1.63       | 40.66  | 18.31       | 16.18        | 88.48      | 1.03        | 23.94        | 95.19               | 99.16        | 27.42 | 31.47                        | 1.15 | 0.15 | 263.98                   |
| GM            | 131.95                           | 138.00                           | 155.13                        | 205.67     | 2.01       | 1.27       | 35.09  | 17.46       | 14.64        | 83.30      | 0.69        | 19.66        | 103.98              | 69.22        | 32.08 | 36.00                        | 1.14 | 0.15 | 243.07                   |
| Minimum       | 67.04                            | 81.00                            | 83.70                         | 136.67     | 1.50       | 0.27       | 12.29  | 13.68       | 9.14         | 66.65      | 0.35        | 13.54        | 75.37               | 35.15        | 20.72 | 25.73                        | 0.89 | 0.12 | 185.56                   |
| Maximum       | 210.00                           | 220.59                           | 261.48                        | 263.33     | 2.97       | 3.16       | 53.70  | 20.56       | 18.21        | 88.84      | 1.08        | 24.92        | 134.81              | 99.16        | 41.93 | 46.84                        | 1.38 | 0.18 | 303.59                   |
| std           | 36.34                            | 38.46                            | 41.63                         | 38.28      | 0.32       | 0.63       | 7.94   | 1.88        | 2.29         | 5.52       | 0.19        | 3.56         | 16.61               | 15.64        | 5.85  | 4.96                         | 0.11 | 0.01 | 29.71                    |

PH- Plant height, CD- cane diameter, JE-Juice extraction, , Pol%- Sucrose % in juice, SCW- Single cane weight, CY- Cane yield, NBI- Nitrogen balance index, Chl-Chlorophyll concentration, Flav- Flavonoids index, Anth- Anthocaynin index and LA- leaf area, GM-Grand Mean, std- standard deviation.

**Table S2.** Mean performance of *E. procerus* derived hybrids and standard varieties during the year 2019-20

| Clones        | Tiller<br>60<br>DAP<br>(000-<br>ha) | Tiller<br>90D<br>AP<br>(000-<br>ha) | Tiller<br>120<br>DAP<br>(000-<br>ha) | PH<br>(cm) | CD<br>(cm) | JW<br>(kg) | JE (%) | Brix<br>(%) | Pol %<br>(%) | Pur<br>(%) | SCW<br>(kg) | Fibre<br>(%) | NMC<br>(000-<br>ha) | CY<br>(t/ha) | NBI   | Chl<br>(µg/cm <sup>2</sup> ) | Flav | Anth | LA<br>(cm <sup>2</sup> ) |
|---------------|-------------------------------------|-------------------------------------|--------------------------------------|------------|------------|------------|--------|-------------|--------------|------------|-------------|--------------|---------------------|--------------|-------|------------------------------|------|------|--------------------------|
| Co 0238       | 140.00                              | 70.00                               | 58.15                                | 238.33     | 2.35       | 2.41       | 45.22  | 18.84       | 16.17        | 85.88      | 1.08        | 22.84        | 87.31               | 90.50        | 29.34 | 38.41                        | 1.33 | 0.13 | 274.55                   |
| Co 06027      | 88.89                               | 82.96                               | 70.00                                | 182.67     | 2.84       | 3.06       | 52.21  | 19.46       | 16.83        | 86.59      | 0.49        | 16.24        | 117.04              | 47.59        | 29.49 | 33.20                        | 1.14 | 0.14 | 223.00                   |
| CoJ 64        | 112.59                              | 69.26                               | 63.33                                | 142.00     | 1.47       | 1.26       | 43.21  | 18.41       | 15.70        | 85.22      | 0.47        | 11.53        | 97.04               | 44.06        | 19.38 | 28.80                        | 1.52 | 0.15 | 217.64                   |
| CoS 767       | 108.89                              | 80.37                               | 64.44                                | 137.67     | 1.89       | 0.99       | 34.21  | 18.70       | 16.00        | 85.54      | 0.59        | 14.42        | 78.52               | 46.47        | 31.38 | 37.20                        | 1.19 | 0.14 | 251.54                   |
| CoS 8436      | 110.37                              | 69.63                               | 57.78                                | 184.74     | 2.03       | 1.47       | 37.21  | 17.86       | 14.88        | 83.24      | 0.72        | 13.83        | 96.30               | 72.89        | 23.71 | 35.40                        | 1.49 | 0.15 | 213.30                   |
| GU 04(28)EO-2 | 79.26                               | 67.78                               | 61.11                                | 240.30     | 1.54       | 0.29       | 15.34  | 14.85       | 11.36        | 76.34      | 0.38        | 21.81        | 102.22              | 38.12        | 40.60 | 44.30                        | 1.10 | 0.14 | 247.42                   |
| GU 12-16      | 137.04                              | 66.67                               | 64.07                                | 120.12     | 1.78       | 0.94       | 29.15  | 16.21       | 12.83        | 79.16      | 0.66        | 19.23        | 102.96              | 66.03        | 32.99 | 35.11                        | 1.07 | 0.13 | 259.87                   |
| GU 12-19      | 191.11                              | 85.19                               | 85.56                                | 230.47     | 1.97       | 1.08       | 33.15  | 18.23       | 15.51        | 85.05      | 0.58        | 17.89        | 130.37              | 72.90        | 38.83 | 36.19                        | 0.93 | 0.12 | 205.53                   |
| GU 12-21      | 80.00                               | 92.59                               | 77.78                                | 173.13     | 2.01       | 0.88       | 28.66  | 15.52       | 12.71        | 81.77      | 0.58        | 20.36        | 134.81              | 77.40        | 33.63 | 37.17                        | 2.16 | 0.16 | 218.62                   |
| GU 12-22      | 50.37                               | 75.56                               | 67.41                                | 136.87     | 2.33       | 0.92       | 34.84  | 16.01       | 12.69        | 79.04      | 0.49        | 16.92        | 99.26               | 48.79        | 21.46 | 28.84                        | 1.36 | 0.15 | 237.07                   |
| GU 12-23      | 77.78                               | 54.81                               | 52.59                                | 253.43     | 1.88       | 1.21       | 34.15  | 16.34       | 13.10        | 79.69      | 0.85        | 19.20        | 83.70               | 71.23        | 41.73 | 40.08                        | 0.97 | 0.13 | 213.20                   |
| GU 12-26      | 131.85                              | 65.93                               | 61.85                                | 248.37     | 1.87       | 1.59       | 35.15  | 18.00       | 15.27        | 84.77      | 0.74        | 18.92        | 77.22               | 56.04        | 33.92 | 40.98                        | 1.20 | 0.16 | 234.89                   |
| GU 12-27      | 169.63                              | 90.15                               | 97.41                                | 263.33     | 2.17       | 1.46       | 31.44  | 15.64       | 12.58        | 80.21      | 0.72        | 18.86        | 102.22              | 73.87        | 30.27 | 33.56                        | 1.11 | 0.14 | 218.03                   |
| GU 12-28      | 169.63                              | 75.56                               | 60.74                                | 242.33     | 1.73       | 1.09       | 30.21  | 15.37       | 11.71        | 76.29      | 0.77        | 18.74        | 82.74               | 63.39        | 37.33 | 40.49                        | 1.11 | 0.13 | 253.28                   |
| GU 12-29      | 102.96                              | 63.70                               | 62.96                                | 159.47     | 1.47       | 0.79       | 33.48  | 17.13       | 13.54        | 78.28      | 0.43        | 20.42        | 120.44              | 43.97        | 24.31 | 30.44                        | 1.25 | 0.15 | 226.00                   |
| GU 12-30      | 200.00                              | 93.70                               | 83.96                                | 247.35     | 1.83       | 1.01       | 30.22  | 16.77       | 13.54        | 80.92      | 1.15        | 21.60        | 81.03               | 92.85        | 20.14 | 25.58                        | 1.27 | 0.17 | 208.62                   |
| GU 12-31      | 158.52                              | 104.07                              | 99.63                                | 231.32     | 2.14       | 1.20       | 34.21  | 15.40       | 12.23        | 79.30      | 0.64        | 18.85        | 109.52              | 68.03        | 27.14 | 30.29                        | 1.12 | 0.16 | 284.53                   |
| GU 12-33      | 97.78                               | 61.11                               | 62.85                                | 190.23     | 1.08       | 0.63       | 30.55  | 16.65       | 14.00        | 83.62      | 0.65        | 22.75        | 101.00              | 62.14        | 32.10 | 32.76                        | 1.04 | 0.14 | 216.37                   |
| GU 12-34      | 72.59                               | 76.30                               | 66.67                                | 172.33     | 2.24       | 1.16       | 35.14  | 16.74       | 13.40        | 79.79      | 0.51        | 17.05        | 111.11              | 60.09        | 38.38 | 39.46                        | 1.03 | 0.11 | 269.70                   |
| GU 12-38      | 173.33                              | 100.56                              | 87.78                                | 220.33     | 1.94       | 1.63       | 39.55  | 17.61       | 15.17        | 85.90      | 1.04        | 17.11        | 87.19               | 90.03        | 24.71 | 27.93                        | 1.14 | 0.16 | 270.72                   |
| GM            | 122.63                              | 77.29                               | 70.30                                | 200.74     | 1.93       | 1.25       | 34.37  | 16.99       | 13.96        | 81.83      | 0.68        | 18.43        | 100.11              | 64.32        | 30.54 | 34.81                        | 1.23 | 0.14 | 237.19                   |
| Minimum       | 50.37                               | 54.81                               | 52.59                                | 120.12     | 1.08       | 0.29       | 15.34  | 14.85       | 11.36        | 76.29      | 0.38        | 11.53        | 77.22               | 38.12        | 19.38 | 25.58                        | 0.93 | 0.11 | 205.53                   |
| Maximum       | 200.00                              | 104.07                              | 99.63                                | 263.33     | 2.84       | 3.06       | 52.21  | 19.46       | 16.83        | 86.59      | 1.15        | 22.84        | 134.81              | 92.85        | 41.73 | 44.30                        | 2.16 | 0.17 | 284.53                   |
| Std           | 42.17                               | 13.23                               | 13.22                                | 10.26      | 0.09       | 0.14       | 1.65   | 1.31        | 1.57         | 3.26       | 0.21        | 2.87         | 16.32               | 16.12        | 6.64  | 4.94                         | 0.26 | 0.02 | 24.21                    |

PH- Plant height, CD- cane diameter, JE-Juice extraction, , Pol%- Sucrose % in juice, SCW- Single cane weight, CY- Cane yield, NBI- Nitrogen balance index, Chl-Chlorophyll concentration , Flav- Flavonoids index, Anth- Anthocaynin index and LA- leaf area, GM-Grand Mean, std- standard deviation.
